# Supplementary material for: Differences in reward biased spatial representations in the lateral septum and hippocampus
Source: eLife journal article supplement (doi:10.7554/elife.55252), 2020-05-26
Supplement: supp [file elife-55252-supp-v1.zip]

Archive with 14 entries (14 files):
- elife_poa_e55252_Transparent_Reporting_File.docx
- elife_poa_e55252_Figure_2_figure_supplement_1.pdf
- elife_poa_e55252_Figure_3_figure_supplement_1.pdf
- elife_poa_e55252_Figure_3_figure_supplement_2.pdf
- elife_poa_e55252_Figure_5_figure_supplement_1.pdf
- elife_poa_e55252_Figure_5_figure_supplement_2.pdf
- elife_poa_e55252_Figure_5_figure_supplement_3.pdf
- elife_poa_e55252_Figure_5_figure_supplement_4.pdf
- elife_poa_e55252_Figure_5_figure_supplement_5.pdf
- elife_poa_e55252_Figure_6_figure_supplement_1.pdf
- elife_poa_e55252_Figure_6_figure_supplement_2.pdf
- elife_poa_e55252_Figure_7_figure_supplement_1.pdf
- elife_poa_e55252_Figure_7_figure_supplement_2.pdf
- elife_poa_e55252_Figure_7_figure_supplement_3.pdf
