# Supplementary material for: Differences in reward biased spatial representations in the lateral septum and hippocampus
Source: eLife journal article supplement (doi:10.7554/elife.55252), 2020-05-26

**Figure 6—supplemental figure 2**

**A**

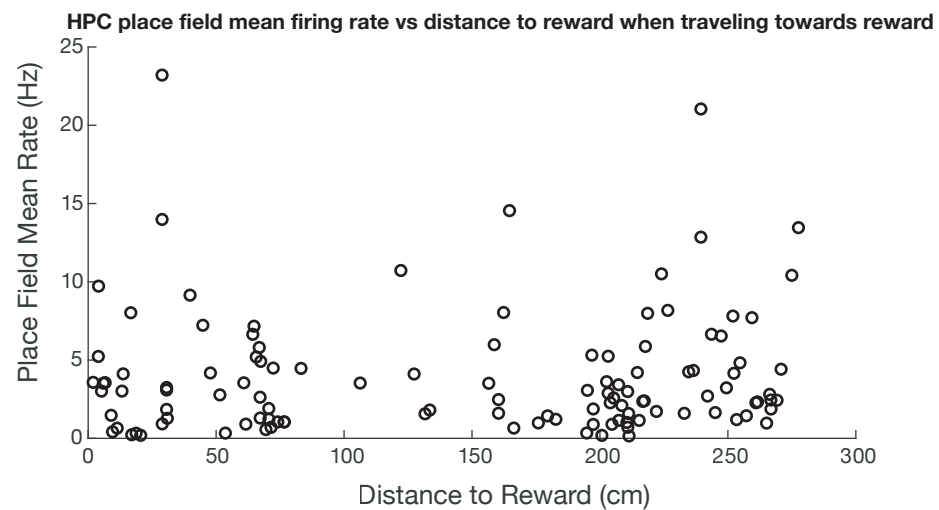

**B**

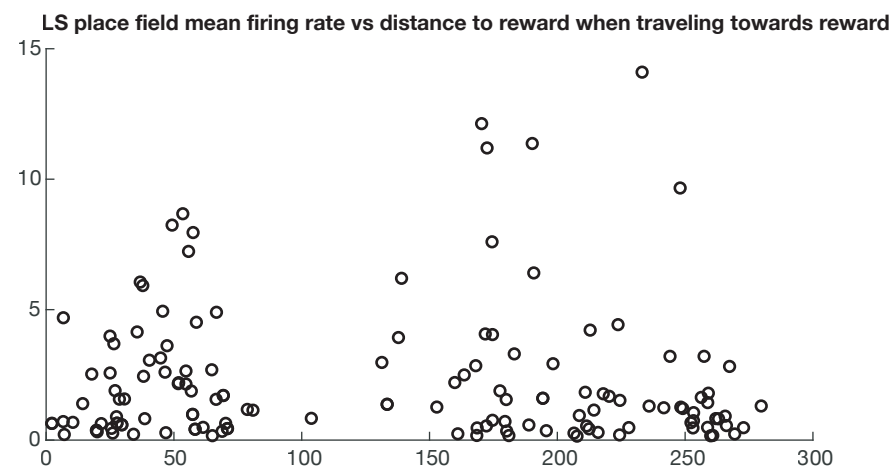

HPC place field mean firing rate vs distance to reward when traveling away from reward

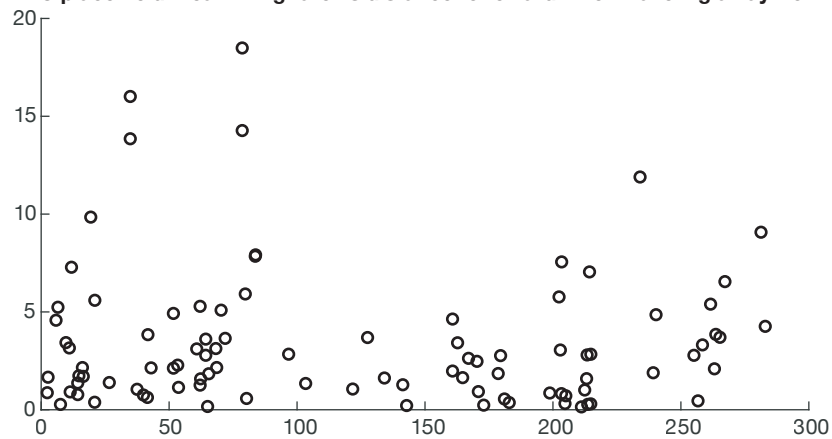

LS place field mean firing rate vs distance to reward when traveling away from reward

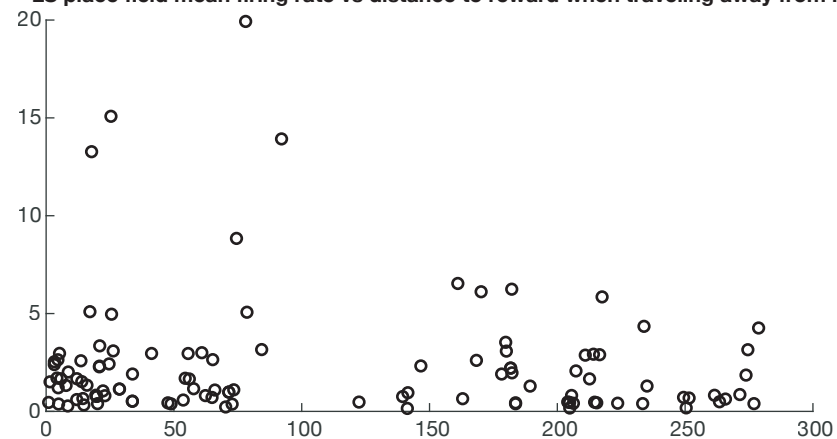

Supplement: supp [file elife-55252-supp-v1.zip › elife_poa_e55252_Figure_6_figure_supplement_2.pdf]
