# Supplementary figures and images for: Differences in reward biased spatial representations in the lateral septum and hippocampus
Source: eLife journal article supplement (doi:10.7554/elife.55252), 2020-05-26

Figure 3 - figure supplement 2

A

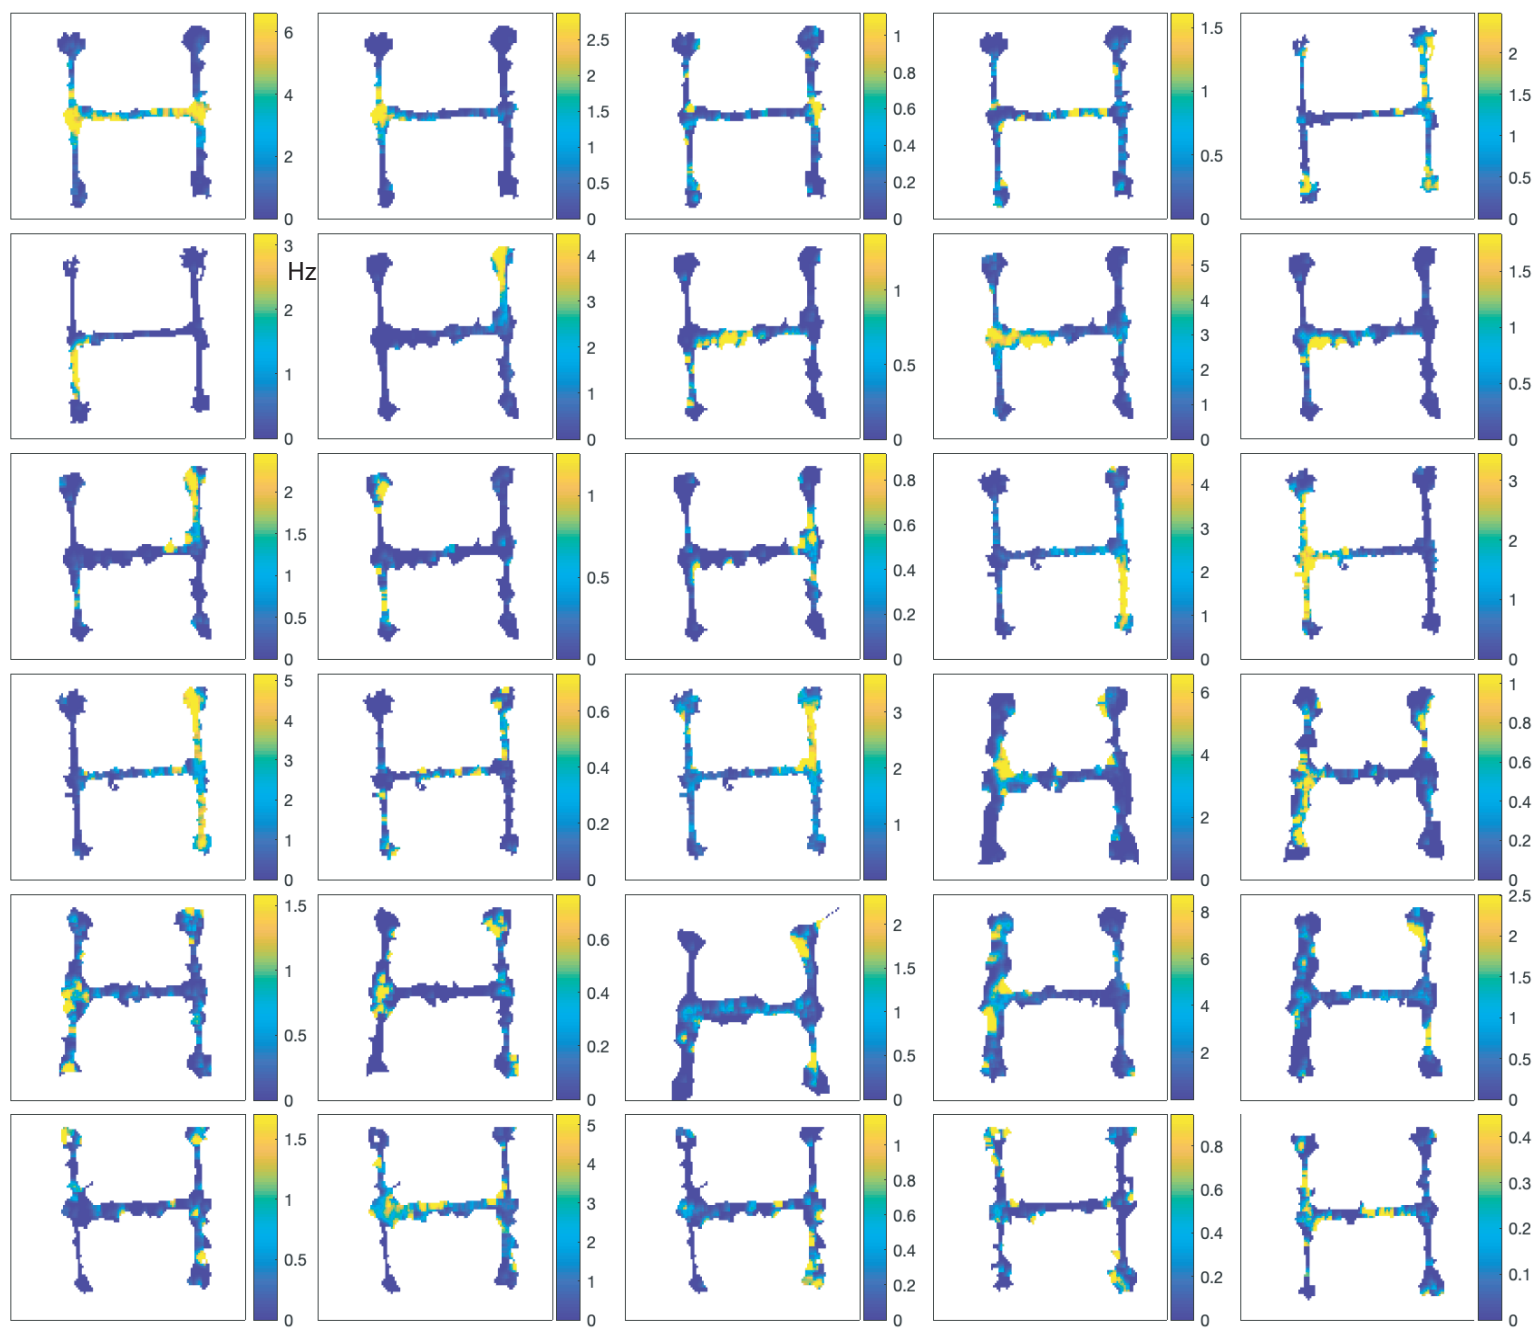

B

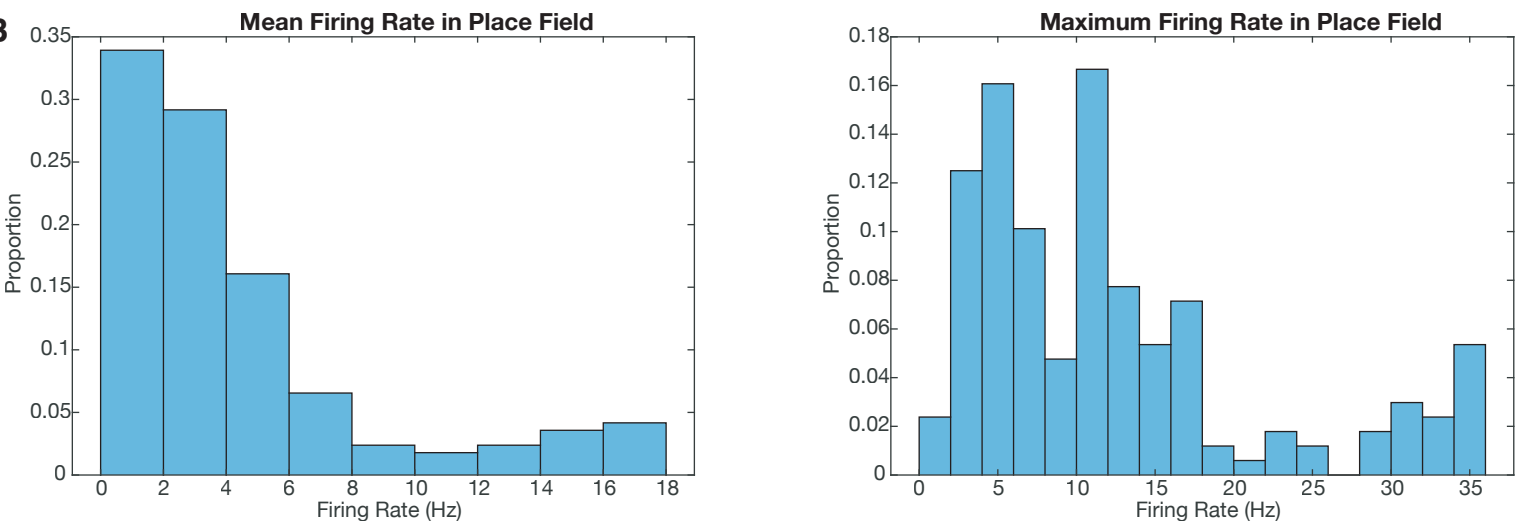

Supplement: supp [file elife-55252-supp-v1.zip]

Figure 7—supplemental figure 2

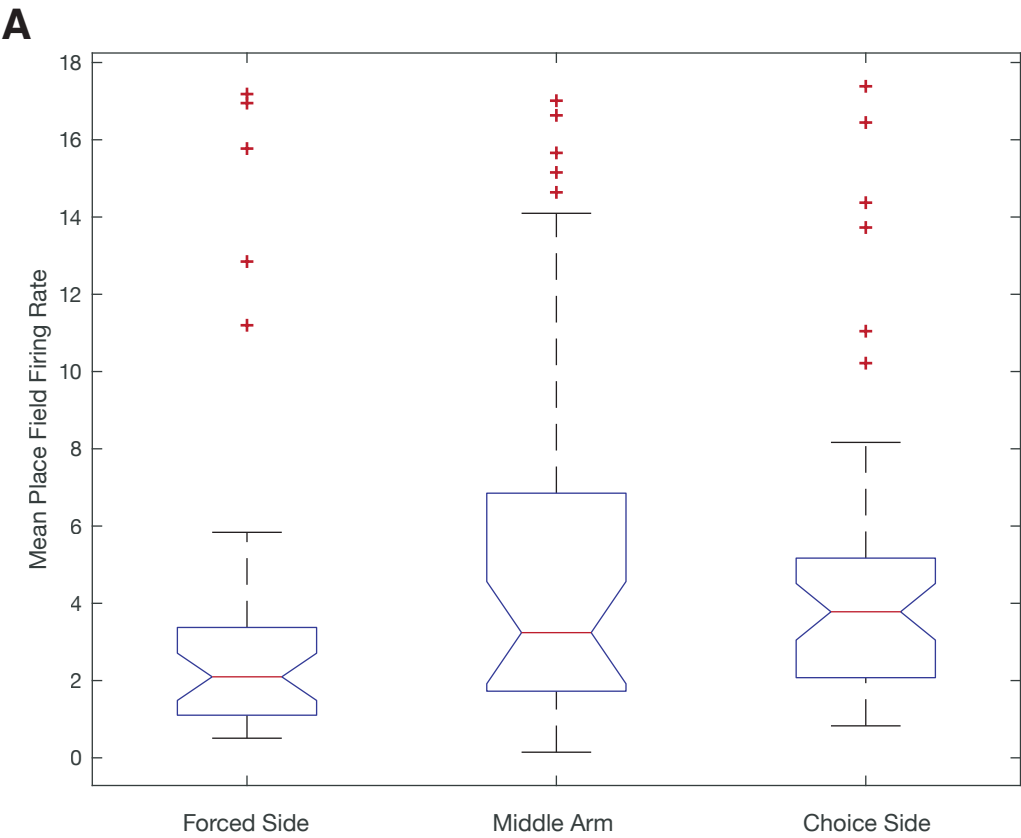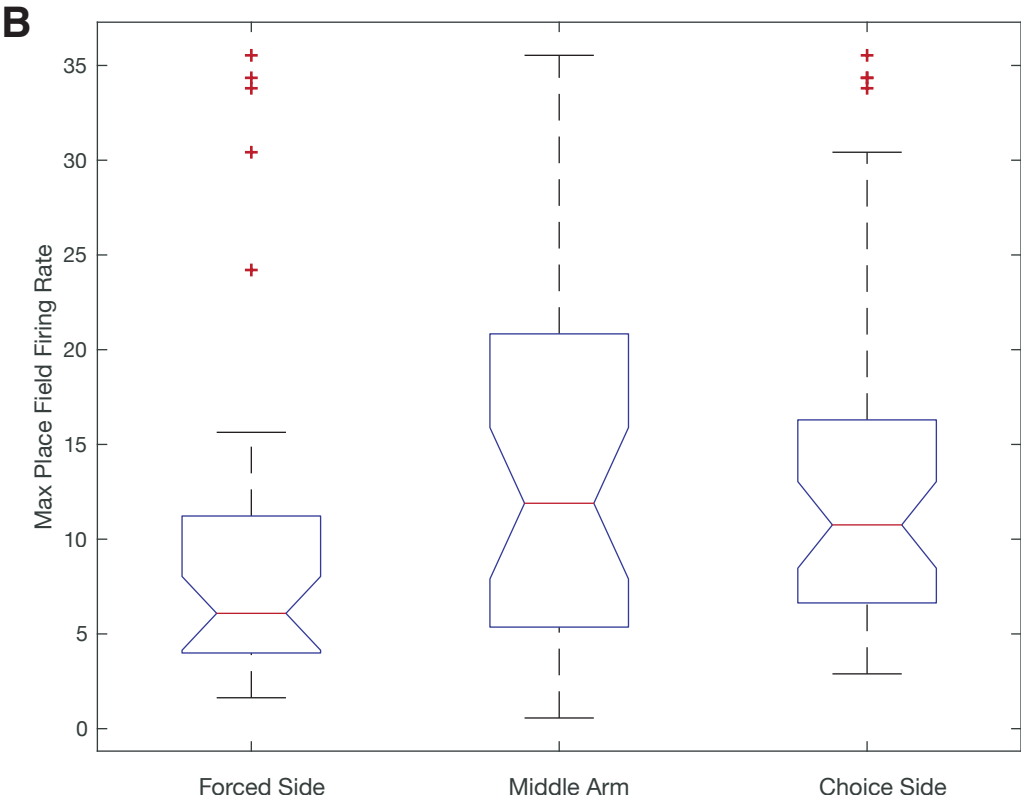

Supplement: supp [file elife-55252-supp-v1.zip]

Figure 5—supplemental figure 3

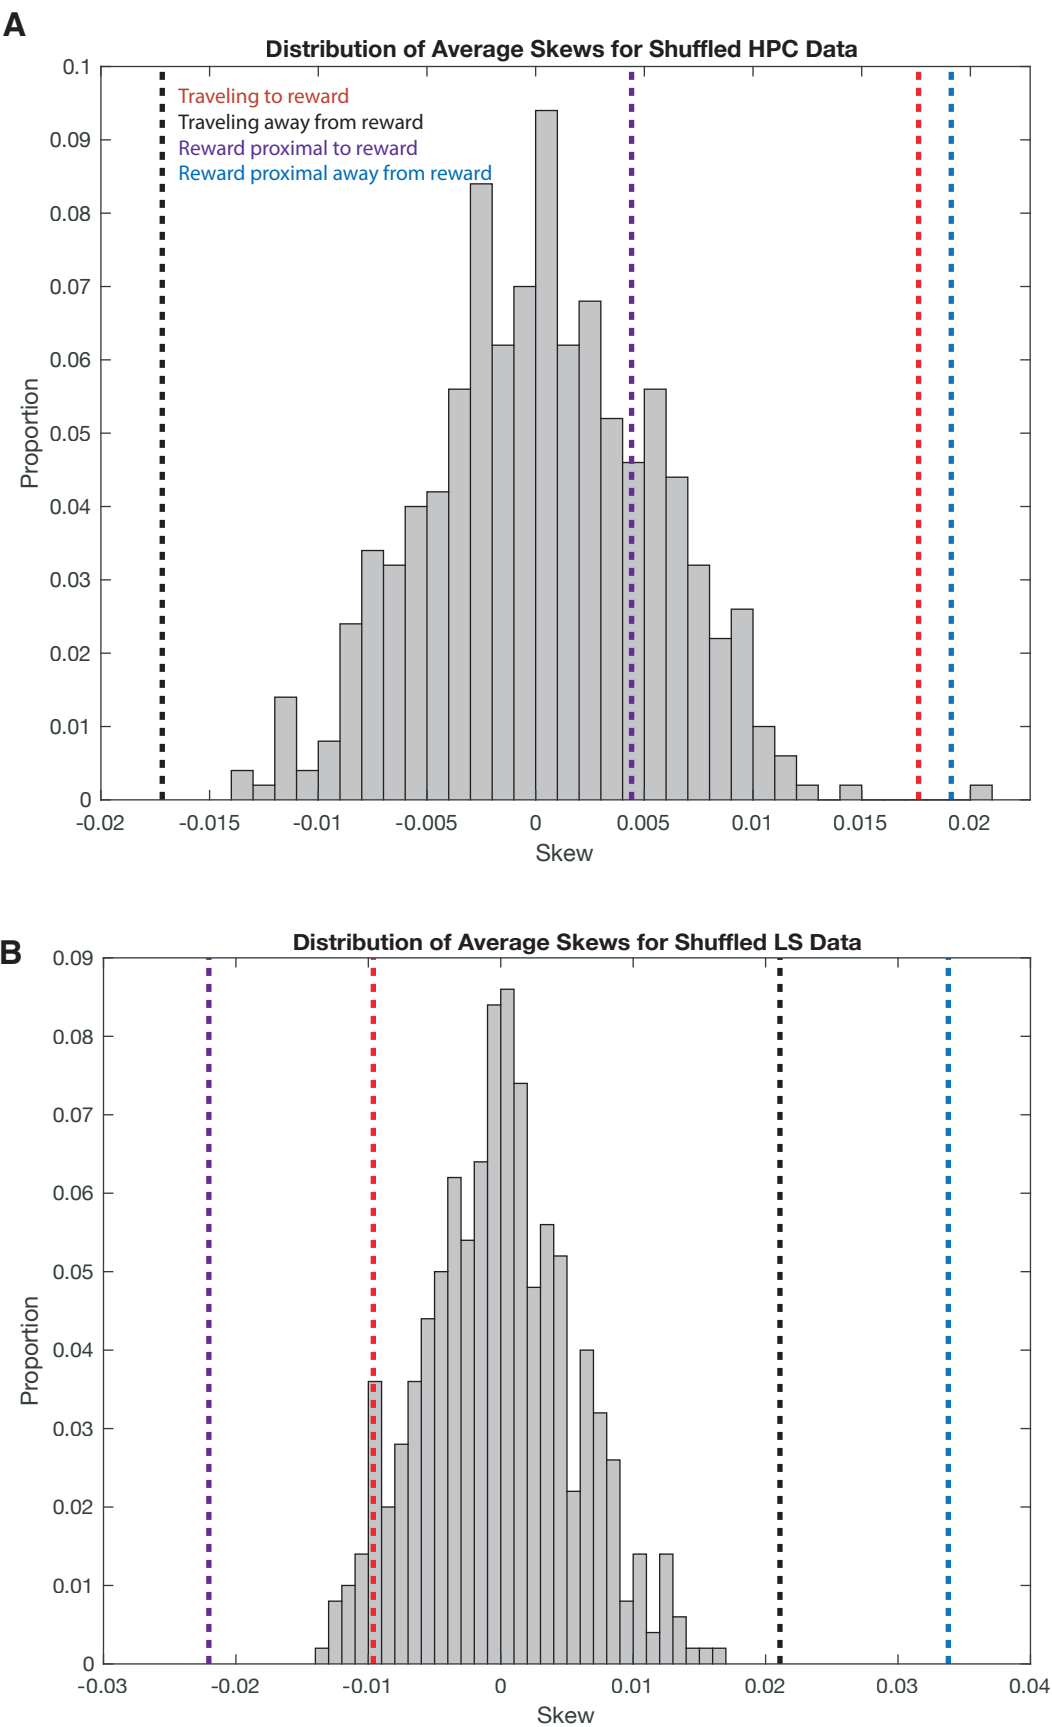

Supplement: supp [file elife-55252-supp-v1.zip]

Figure 5—supplemental figure 1

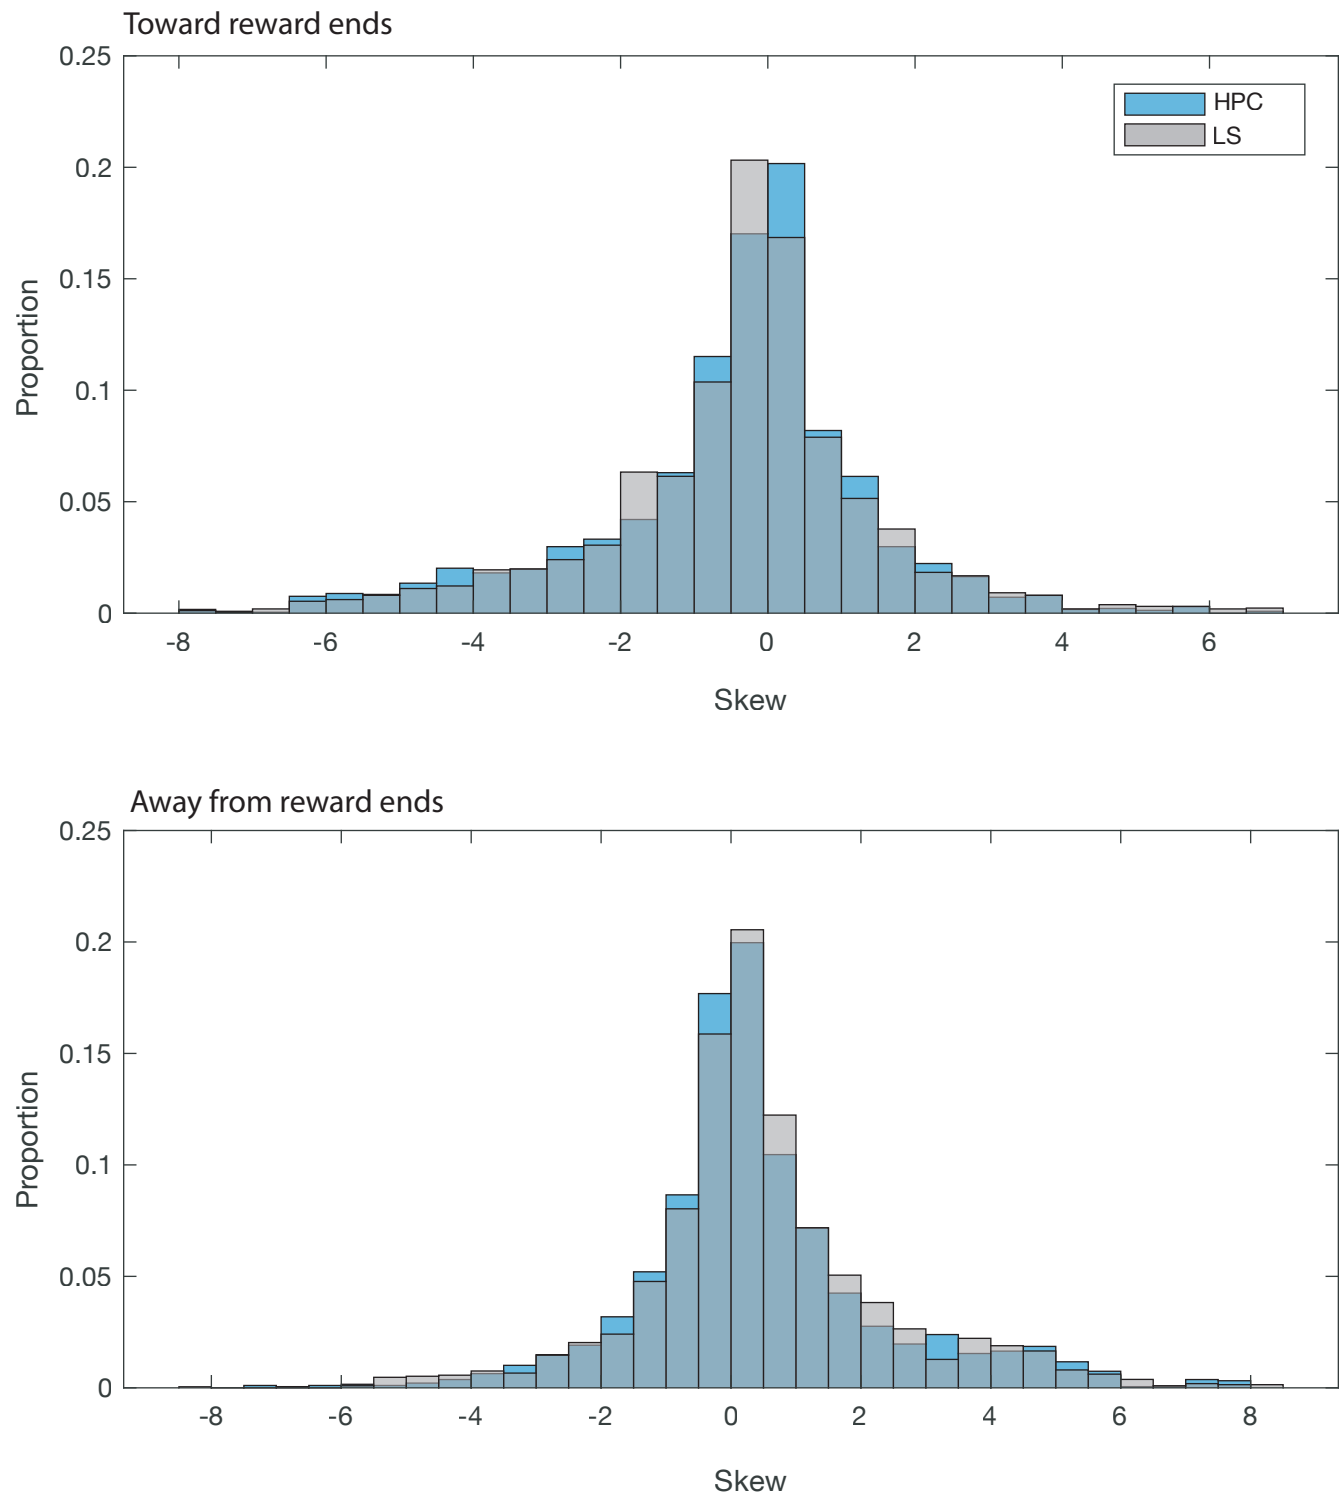

Supplement: supp [file elife-55252-supp-v1.zip]

Figure 2 - figure supplement 1

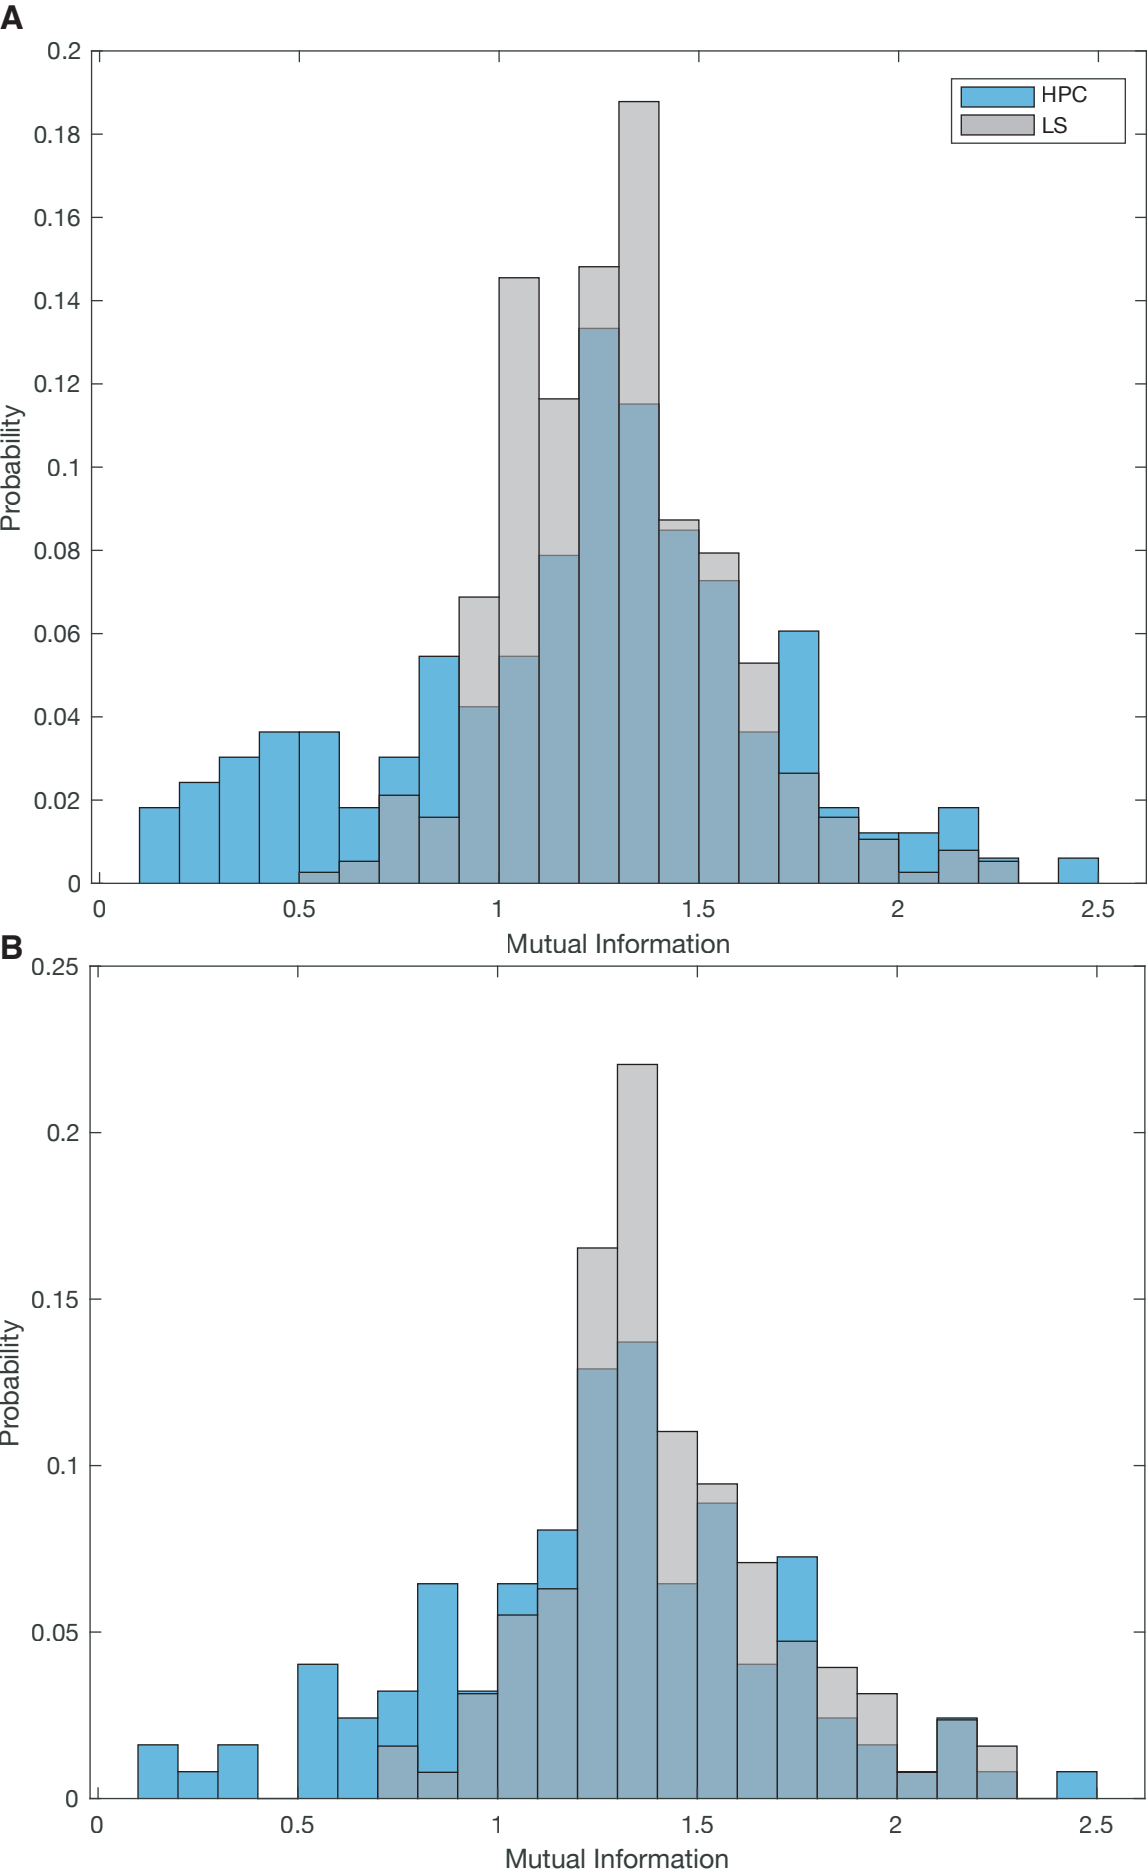

Supplement: supp [file elife-55252-supp-v1.zip › elife_poa_e55252_Figure_2_figure_supplement_1.pdf]

Figure 3 - figure supplement 1

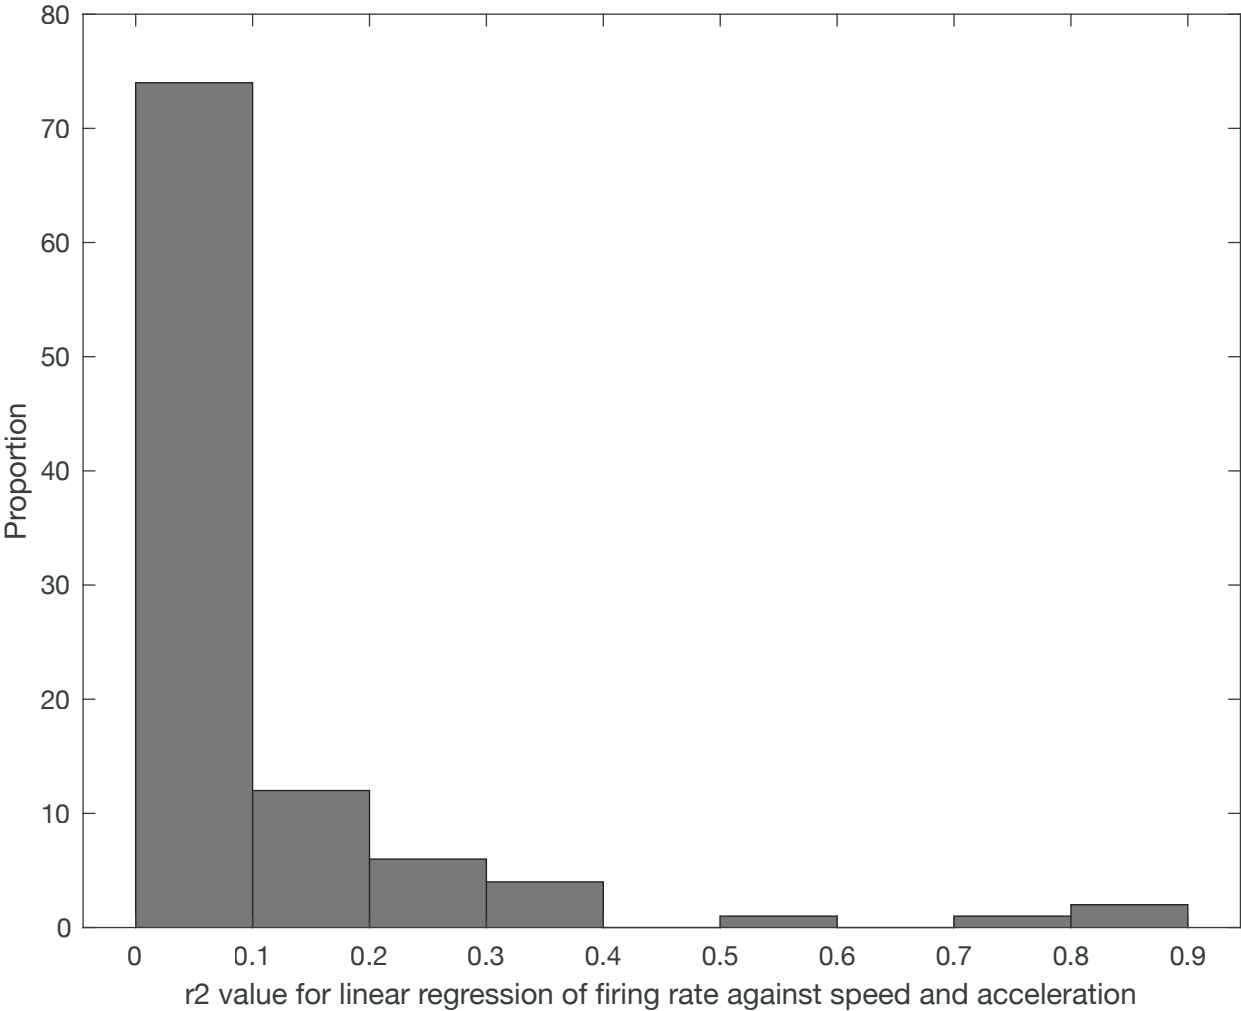

Supplement: supp [file elife-55252-supp-v1.zip › elife_poa_e55252_Figure_3_figure_supplement_1.pdf]

Figure 5—supplemental figure 2

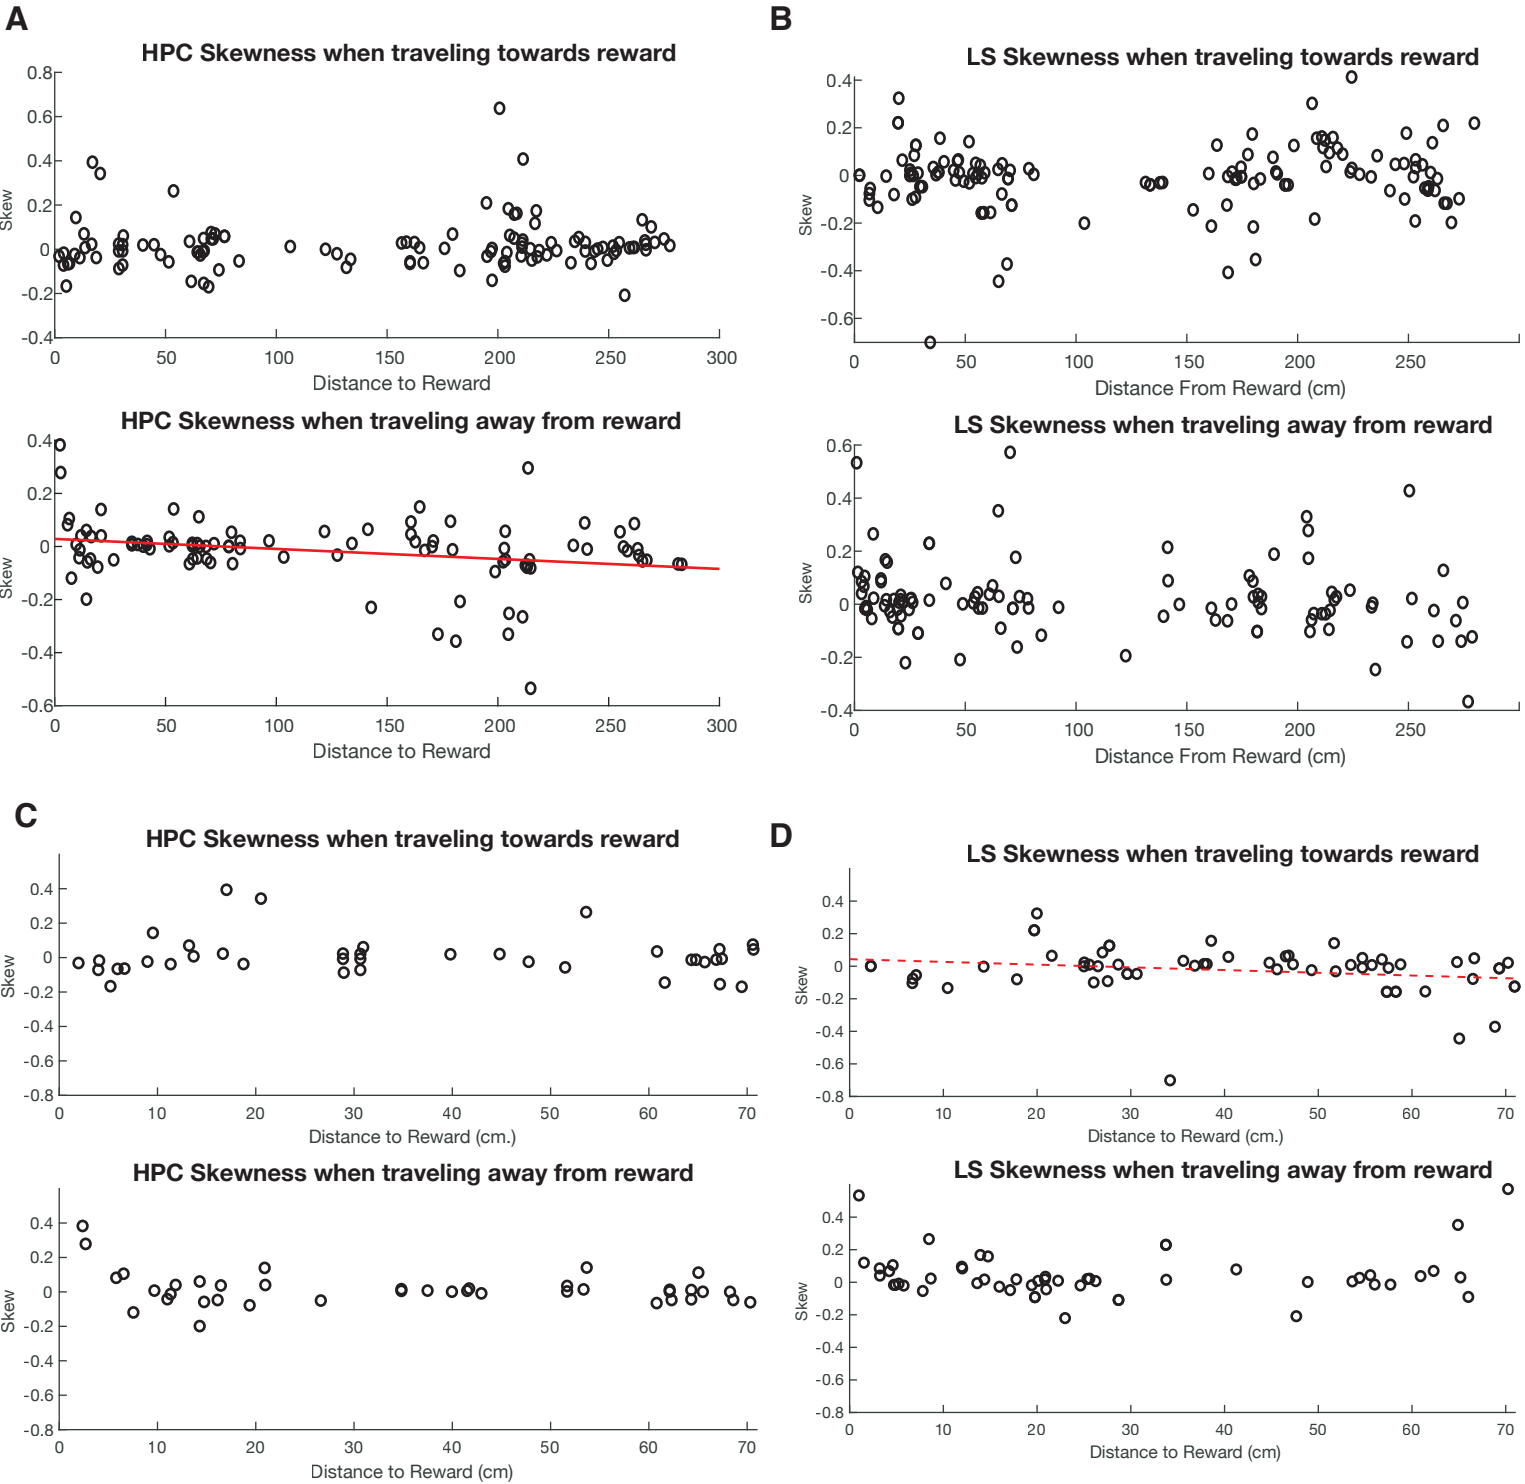

Supplement: supp [file elife-55252-supp-v1.zip › elife_poa_e55252_Figure_5_figure_supplement_2.pdf]

Figure 5—supplemental figure 4

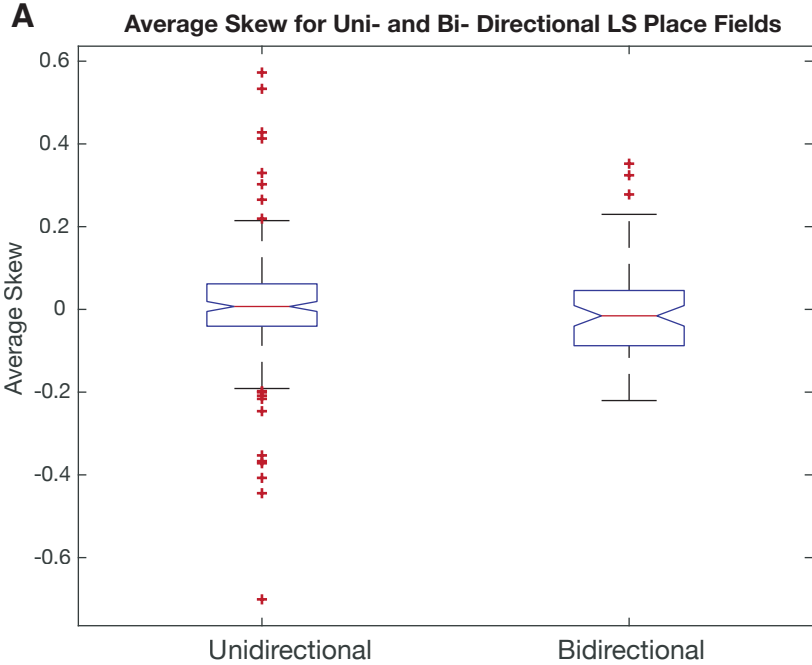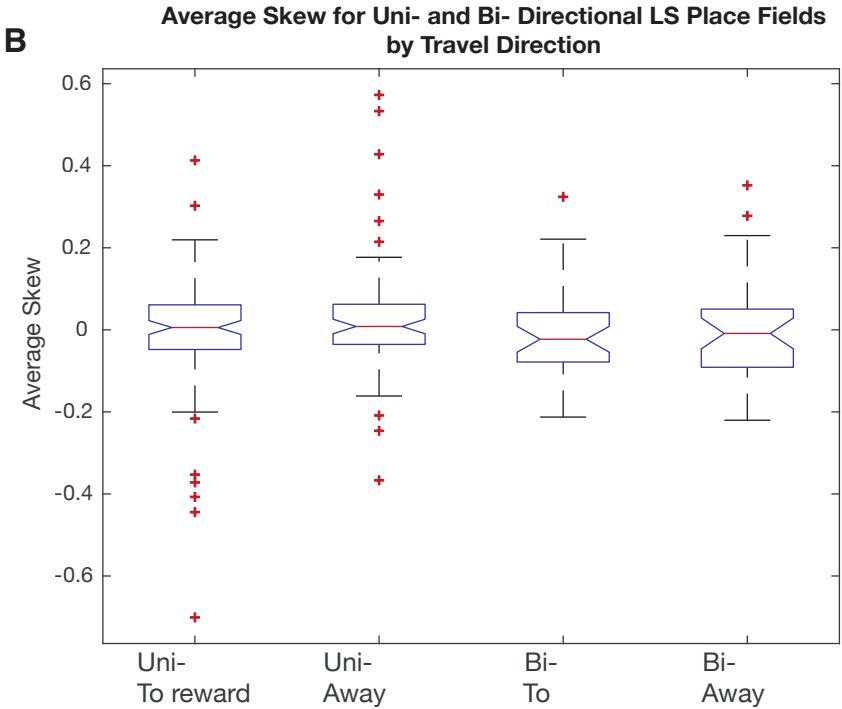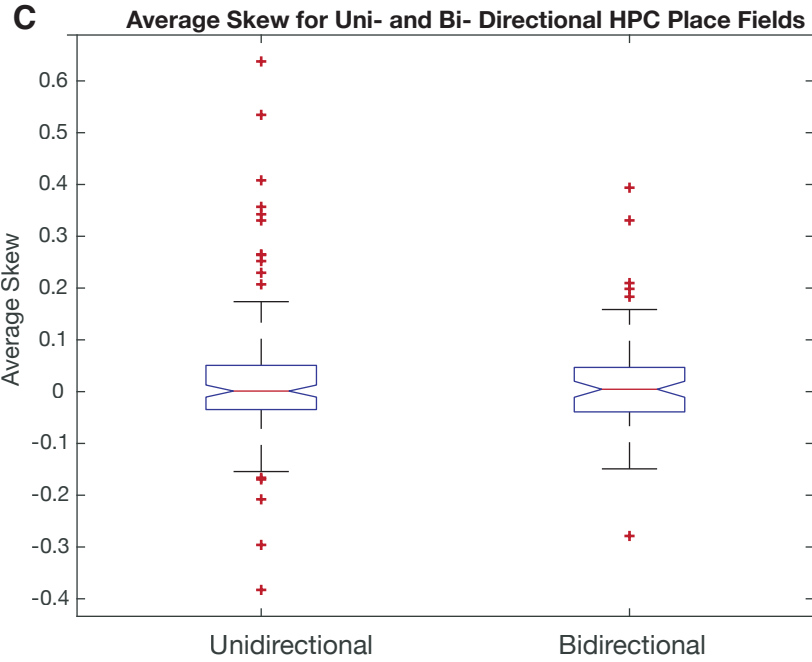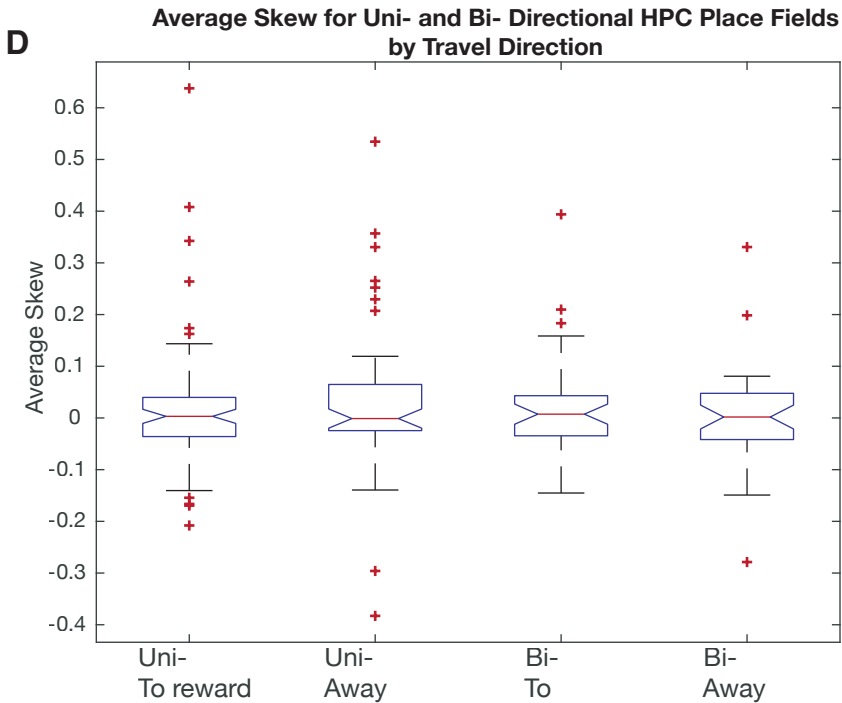

Supplement: supp [file elife-55252-supp-v1.zip › elife_poa_e55252_Figure_5_figure_supplement_4.pdf]

Figure 5—supplemental figure 5

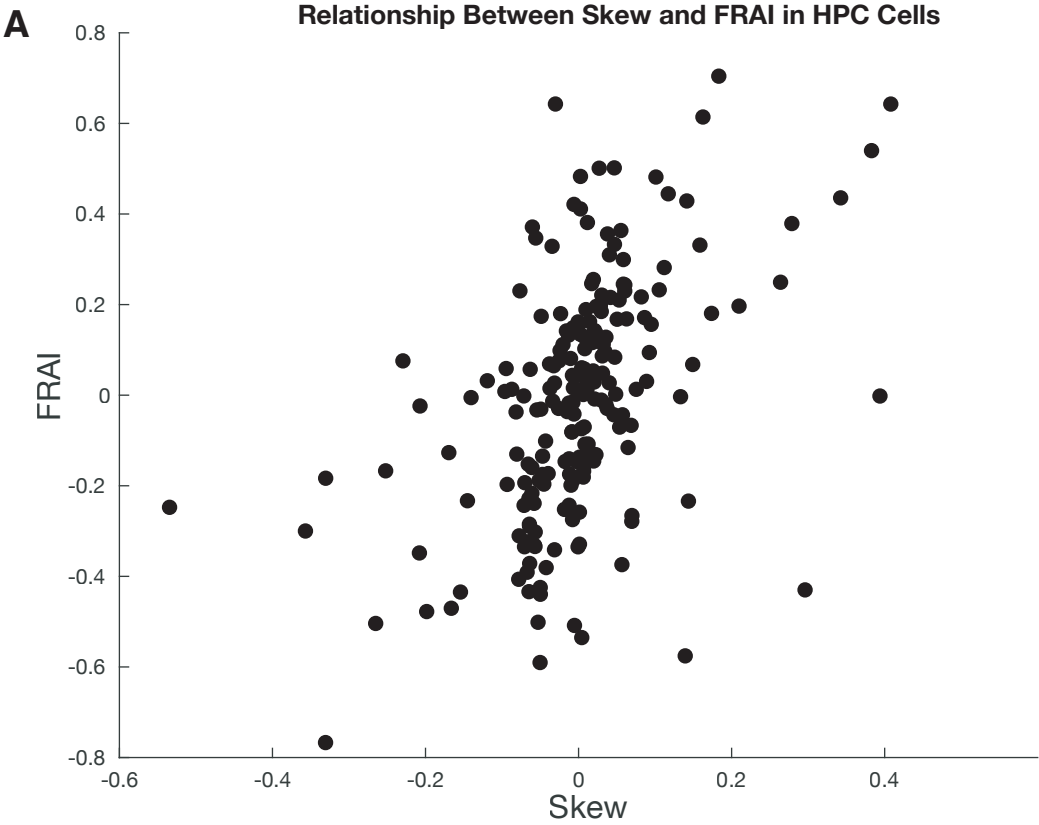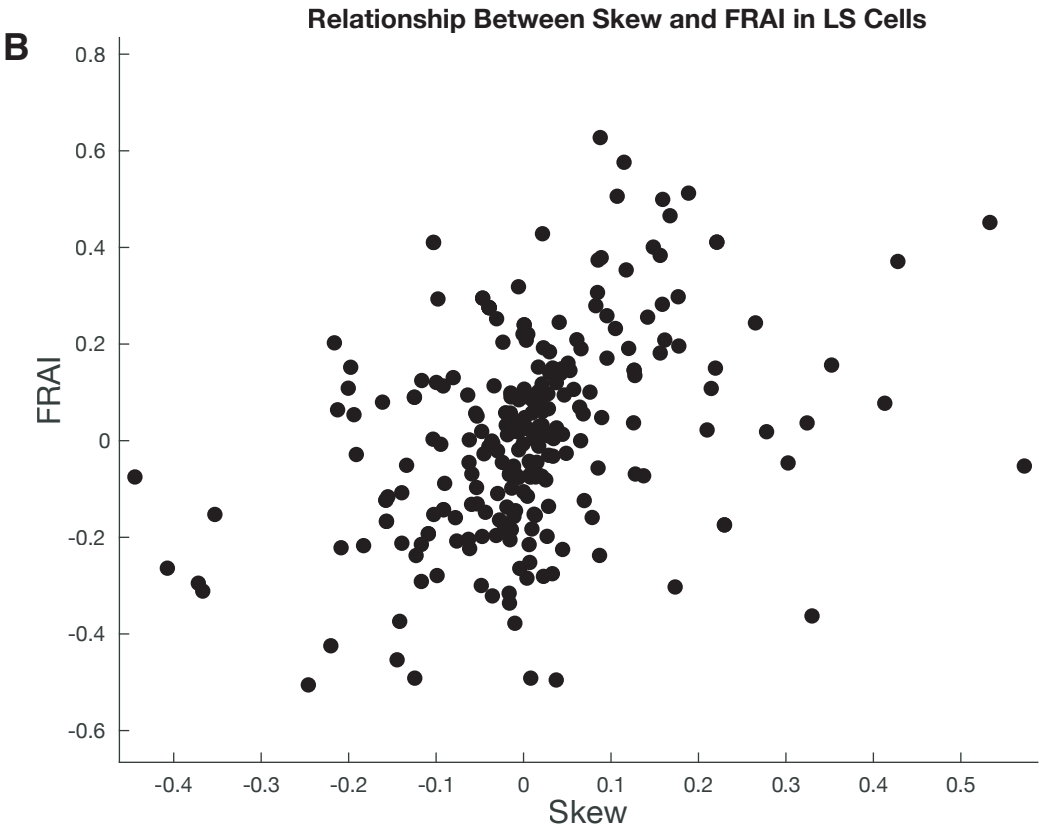

Supplement: supp [file elife-55252-supp-v1.zip › elife_poa_e55252_Figure_5_figure_supplement_5.pdf]

Figure 6—supplemental figure 1

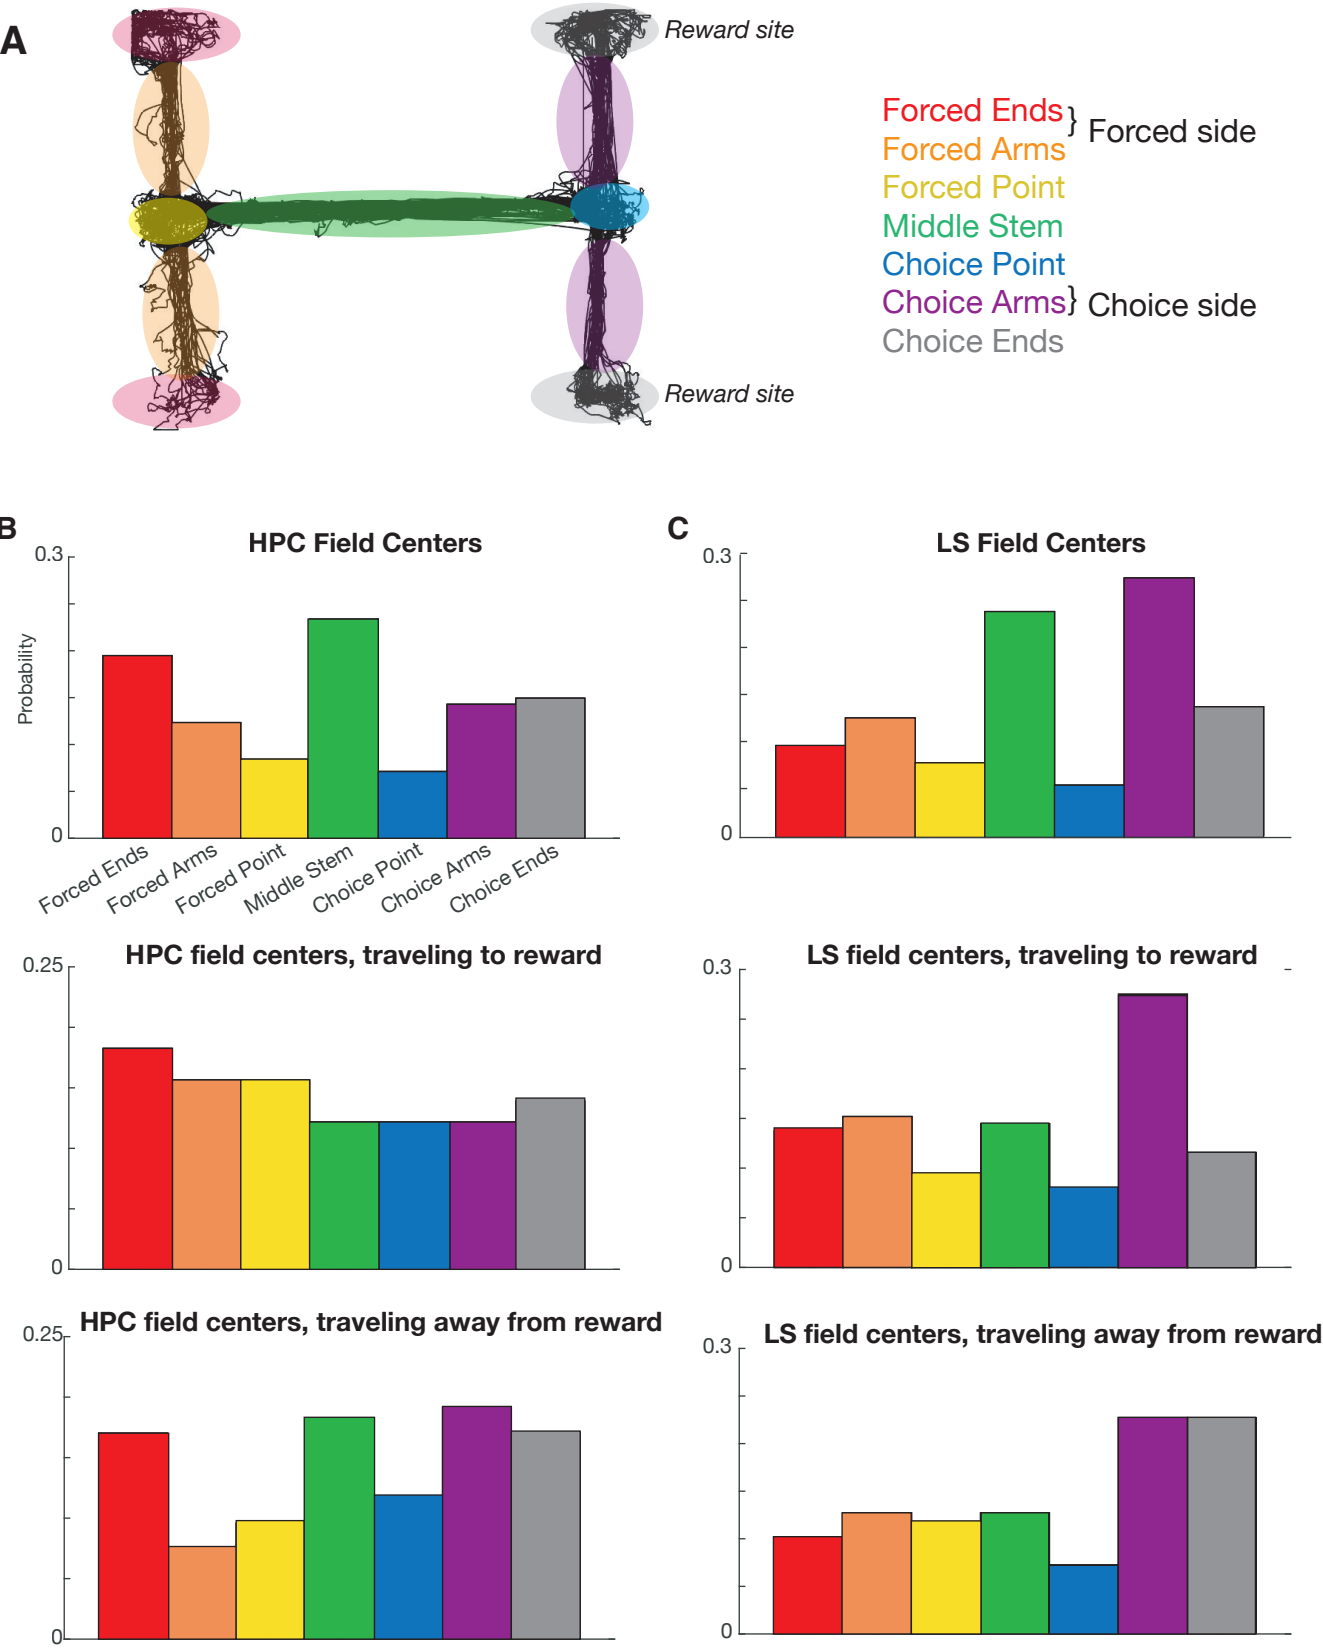

Supplement: supp [file elife-55252-supp-v1.zip › elife_poa_e55252_Figure_6_figure_supplement_1.pdf]

**Figure 7—supplemental figure 1**

**A**

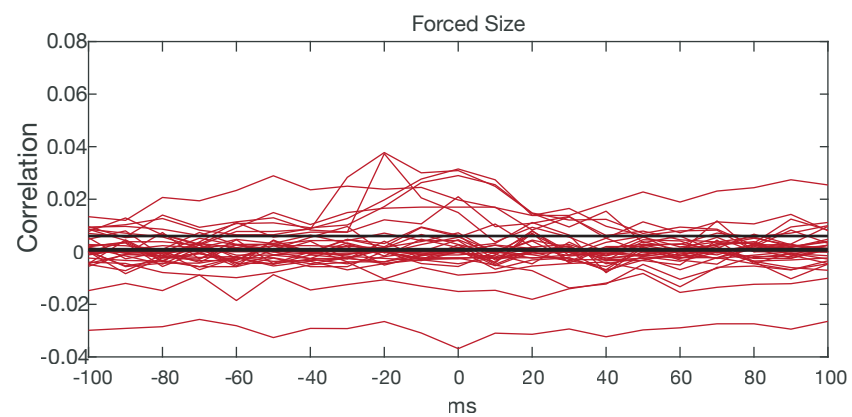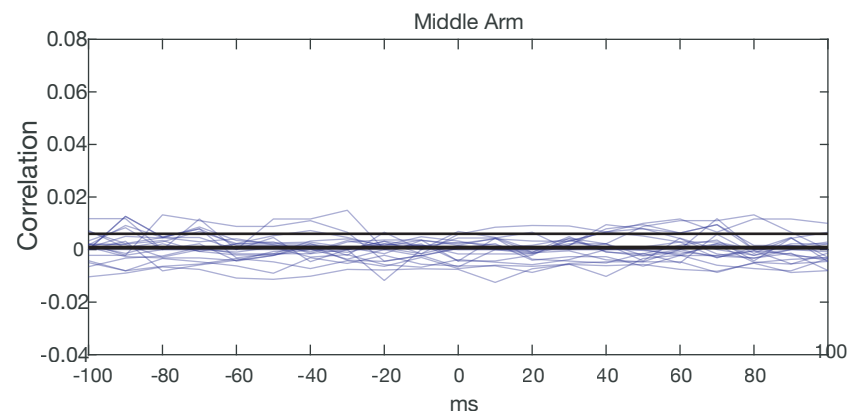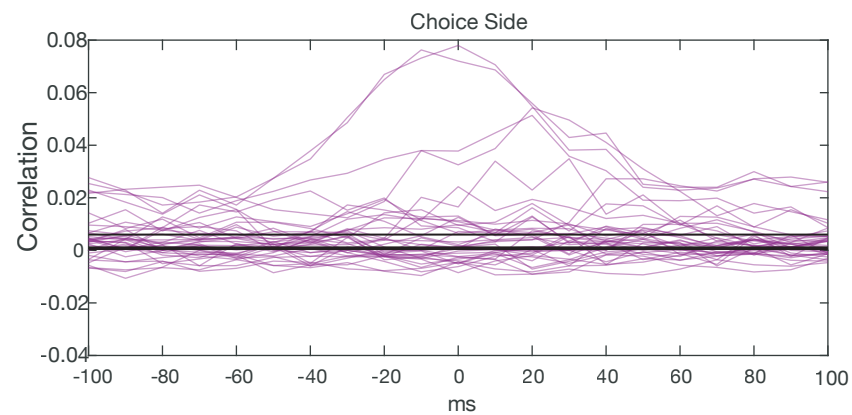

**B**

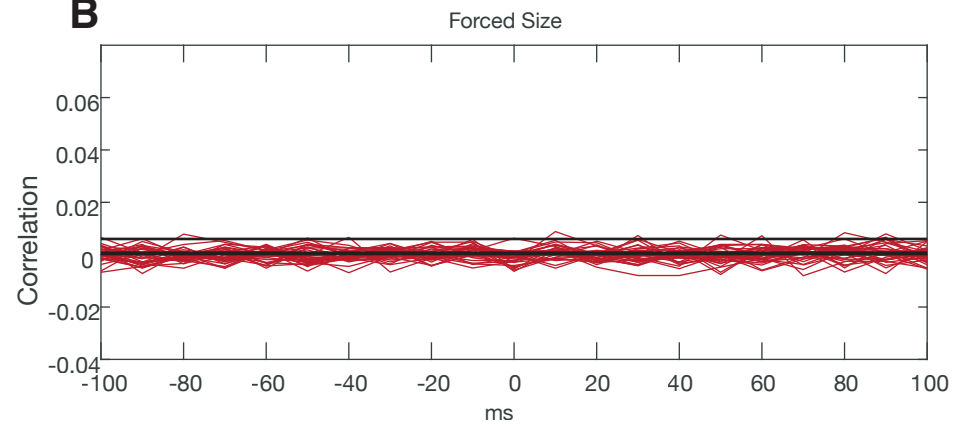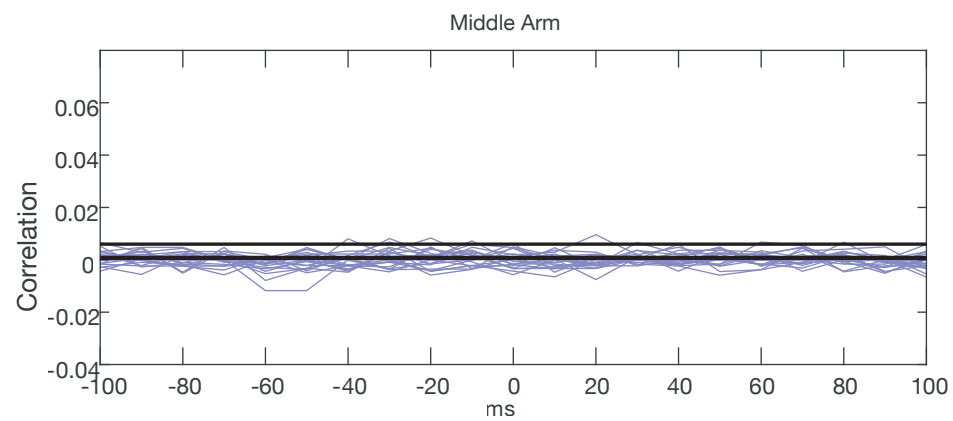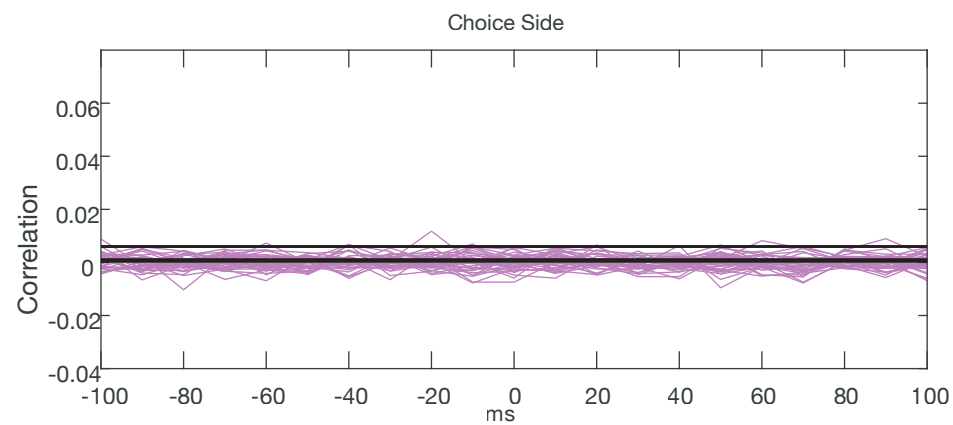

Supplement: supp [file elife-55252-supp-v1.zip › elife_poa_e55252_Figure_7_figure_supplement_1.pdf]

Figure 7—supplemental figure 3

A

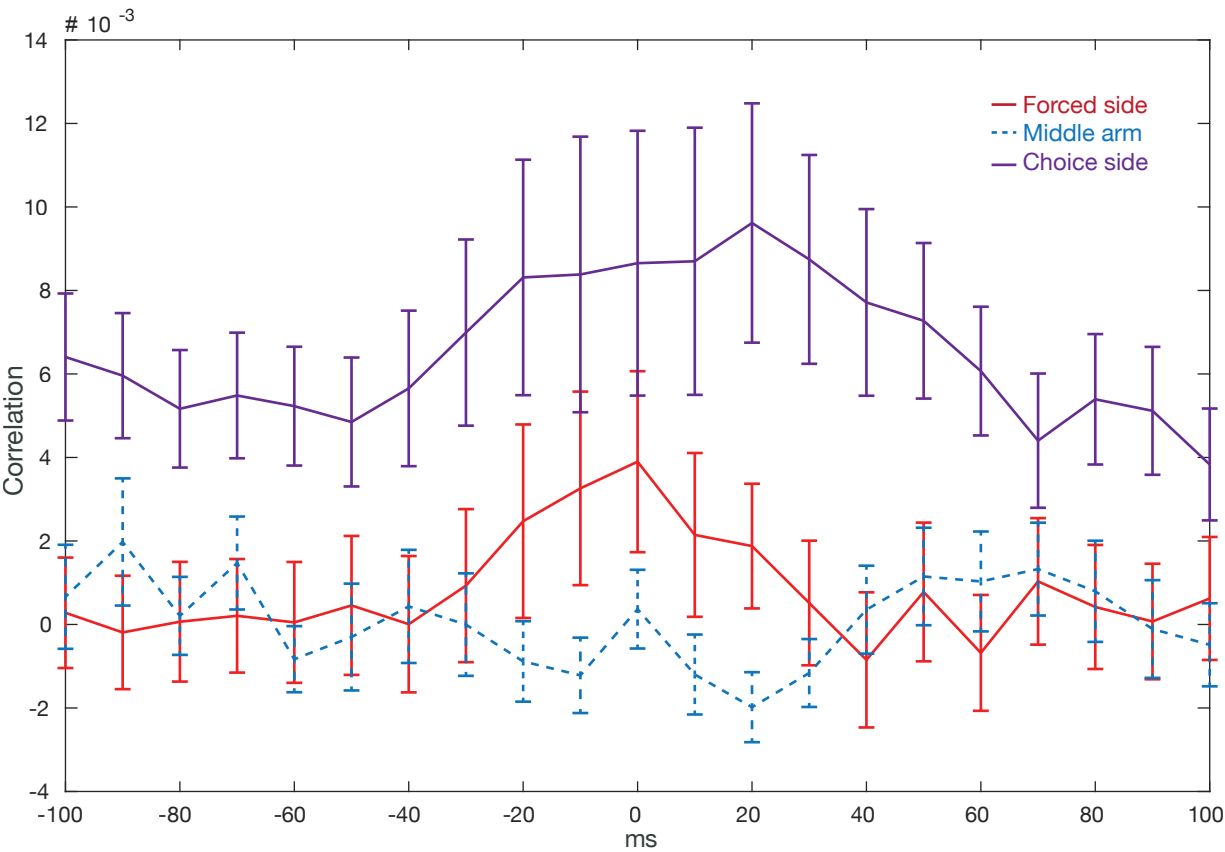

B

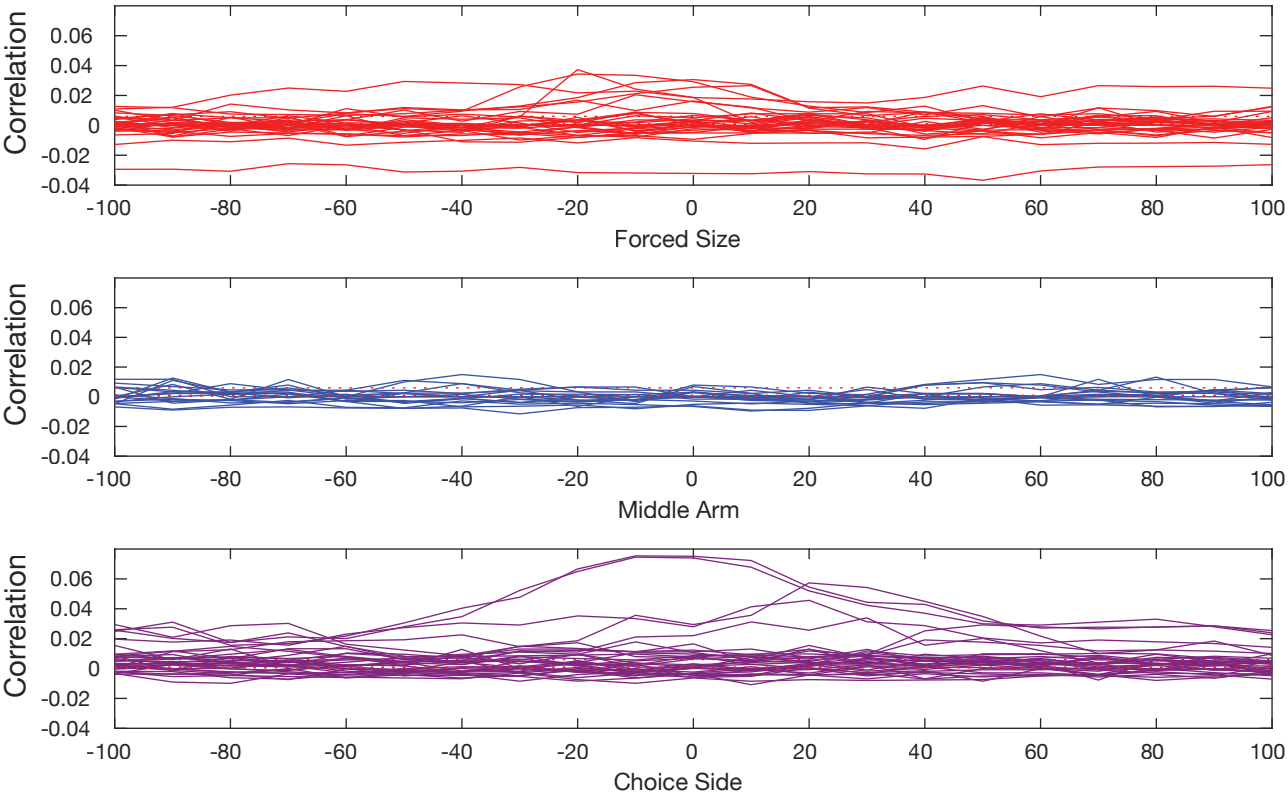

Supplement: supp [file elife-55252-supp-v1.zip › elife_poa_e55252_Figure_7_figure_supplement_3.pdf]
